# Supplementary material
Source: PubMed Central journal article supplement (PMC6983406)
Supplement: pnas.1911159117.sapp.pdf [file pnas.1911159117.sapp.pdf]

## Supporting Information

### Highly efficient binary copper-iron catalyst for photoelectrochemical carbon dioxide reduction toward methane

Baowen Zhou<sup>a,b,1</sup>, Pengfei Ou<sup>c,1</sup>, Nick Pant<sup>a</sup>, Shaobo Cheng<sup>d</sup>, Srinivas Vanka<sup>a,b</sup>, Sheng Chu<sup>b</sup>, Roksana Tonny Rashid<sup>b</sup>, Gianluigi Botton<sup>d</sup>, Jun Song<sup>c,2</sup>, and Zetian Mi<sup>a,b,2</sup>

- a. Department of Electrical Engineering and Computer Science, University of Michigan, Ann Arbor, MI 48109, USA
  - b. Department of Electrical and Computer Engineering, McGill University, Montreal, QC H3A0E9, Canada
  - c. Department of Mining and Materials Engineering, McGill University, Montreal, QC H3A0C5, Canada
  - d. Department of Materials Science and Engineering, Canadian Centre for Electron Microscopy, McMaster University, Hamilton, ON L8S4M1, Canada
1. B.Z. and P.O. contributed equally to this work.
  2. To whom correspondence may be addressed. Email: jun.song2@mcgill.ca or ztmi@umich.edu.

#### Contents

Table S1 and S2

Fig. S1-25

**Table S1.** The bond length and bond angle of CO<sub>2</sub> adsorbed on Cu(111) and Fe<sub>3</sub>O<sub>6</sub>H<sub>6</sub>/Cu(111) compared to its isolated gas-phase (please also refer to Supplementary Figure 1).

| Species (*CO <sub>2</sub> )                            | C–O1(Å) | C–O2(Å) | O–C–O(°) |
|--------------------------------------------------------|---------|---------|----------|
| Gas phase                                              | 1.18    | 1.18    | 180.00   |
| Fe <sub>3</sub> O <sub>6</sub> H <sub>6</sub> /Cu(111) | 1.25    | 1.28    | 126.05   |
| Cu(111)                                                | 1.18    | 1.18    | 179.67   |

**Table S2.** Contributions to the adsorbate free energy from the zero-point energy correction, enthalpic temperature correction, entropy, and the total free energy correction, respectively. The assumed fugacity for each non-adsorbed species are also included.

| Species              | Fugacity<br>(Pa) | ZPE<br>(eV) | $\int C_p dT$<br>(eV) | $-TS$<br>(eV) |
|----------------------|------------------|-------------|-----------------------|---------------|
| *COOH                | -                | 0.62        | 0.10                  | -0.18         |
| *CO                  | -                | 0.19        | 0.08                  | -0.16         |
| *CHO                 | -                | 0.44        | 0.09                  | -0.19         |
| *CH <sub>2</sub> O   | -                | 0.76        | 0.09                  | -0.19         |
| *CH <sub>3</sub> O   | -                | 1.11        | 0.10                  | -0.18         |
| *O                   | -                | 0.07        | 0.03                  | -0.04         |
| *OH                  | -                | 0.36        | 0.05                  | -0.08         |
| *H                   | -                | 0.16        | 0.01                  | -0.01         |
| H <sub>2</sub> (ref) | 101325           | 0.27        | 0.09                  | -0.43         |
| CH <sub>4</sub>      | 20467            | 1.20        | 0.10                  | -0.61         |
| H <sub>2</sub> O     | 3534             | 0.58        | 0.10                  | -0.66         |
| CO <sub>2</sub>      | 101325           | 0.31        | 0.10                  | -0.66         |

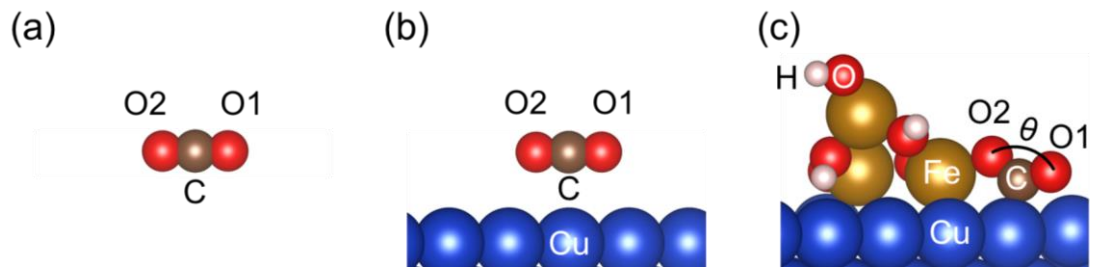

**Fig. S1.** The gas-phase  $\text{CO}_2$  (a) and its optimized configuration of adsorption on  $\text{Cu}(111)$  and  $\text{FeO}_3\text{O}_6\text{H}_6/\text{Cu}(111)$ .

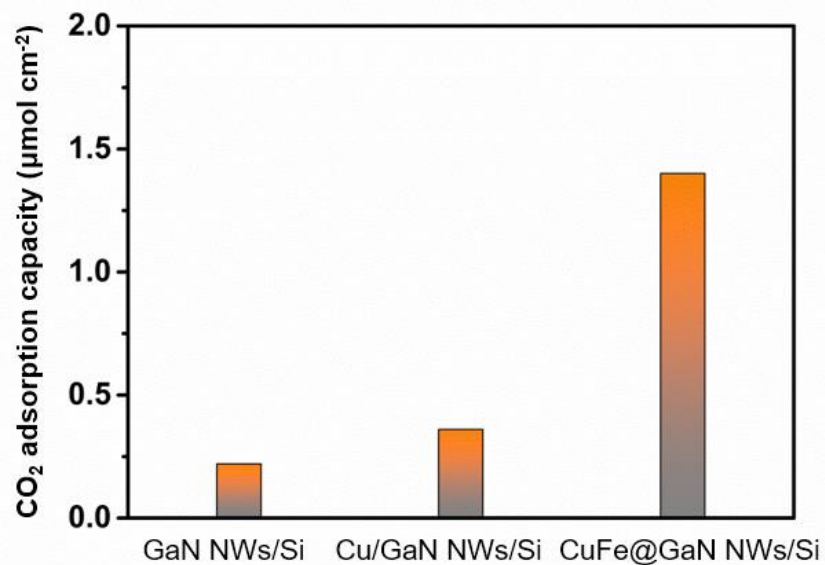

**Fig. S2.**  $\text{CO}_2$  adsorption capacity of GaN NWs/Si, Cu/GaN NWs/Si, and CuFe@GaN NWs/Si.

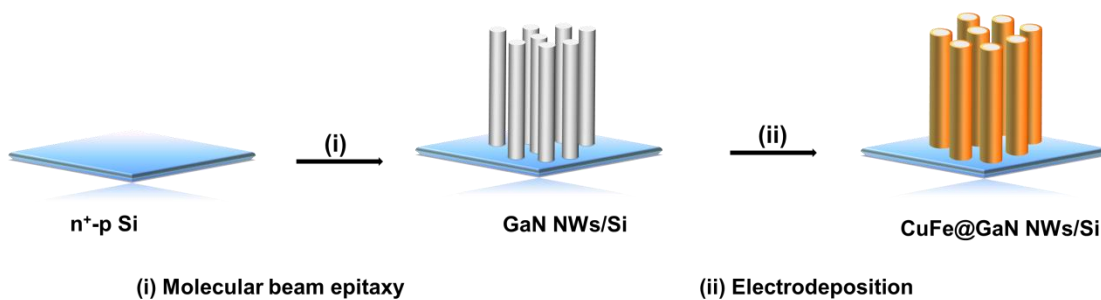

**Fig. S3.** Schematic illustration of synthesizing  $\text{CuFe@GaN NWs/Si}$  through molecular beam epitaxy of GaN nanowires and co-electrodeposition of Cu and Fe.

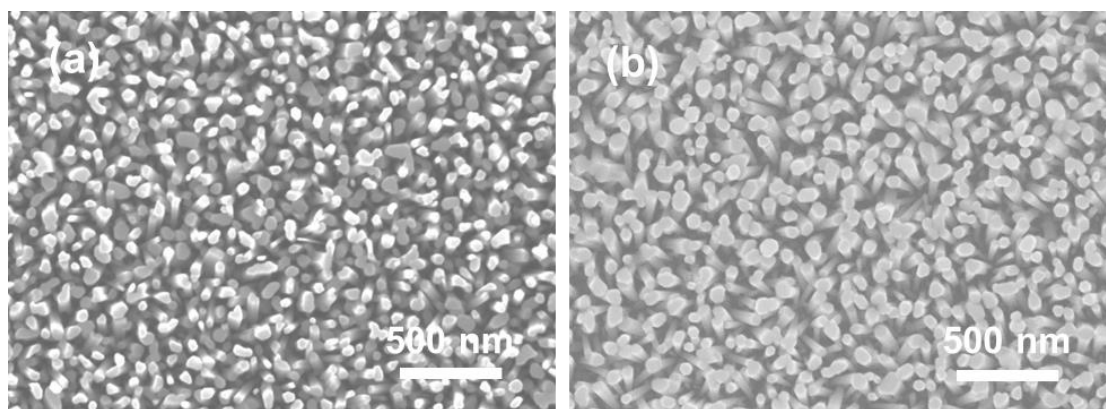

**Fig. S4.** Top-view SEM images of GaN NWs/Si and CuFe@GaN NWs/Si.

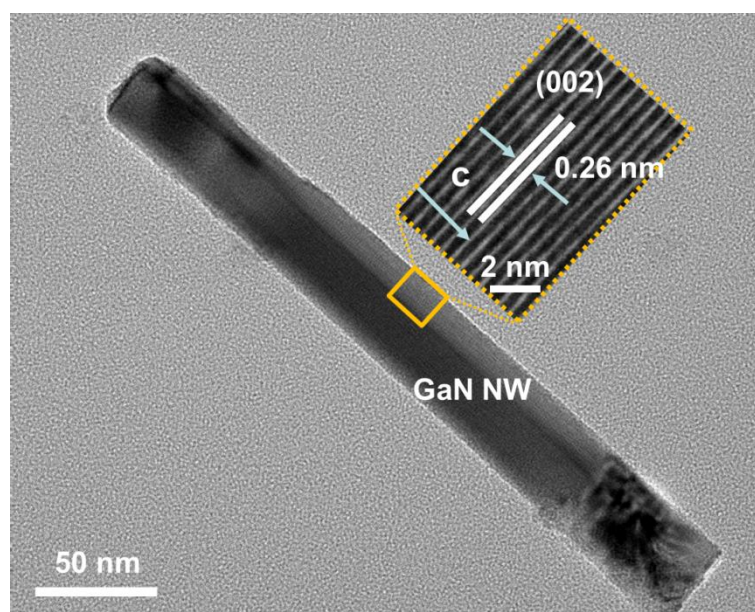

**Fig. S5.** TEM image of bare GaN nanowire. The inset is the high magnification image of GaN nanowire in the yellow box.

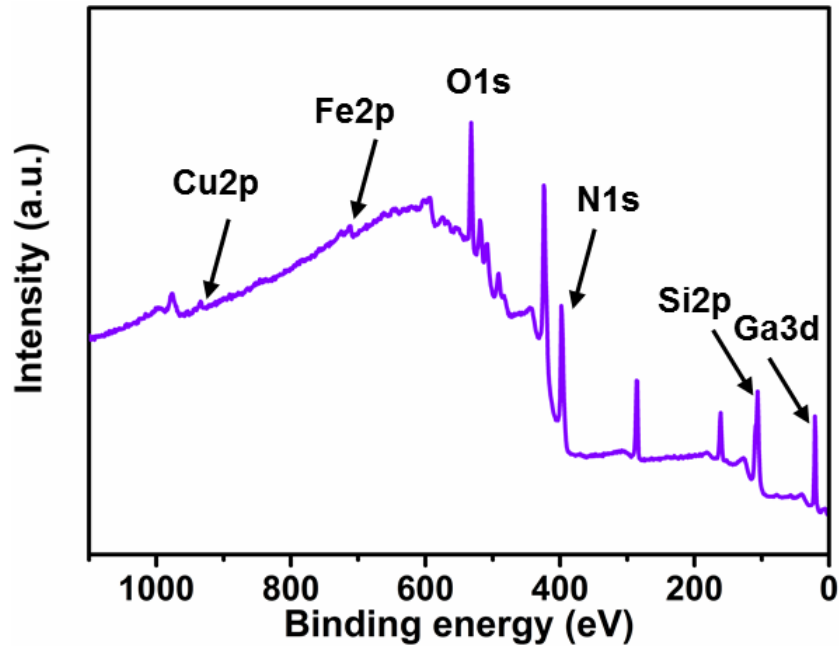

Fig. S6. X-ray photoelectron spectrum survey of CuFe@GaN NWs/Si.

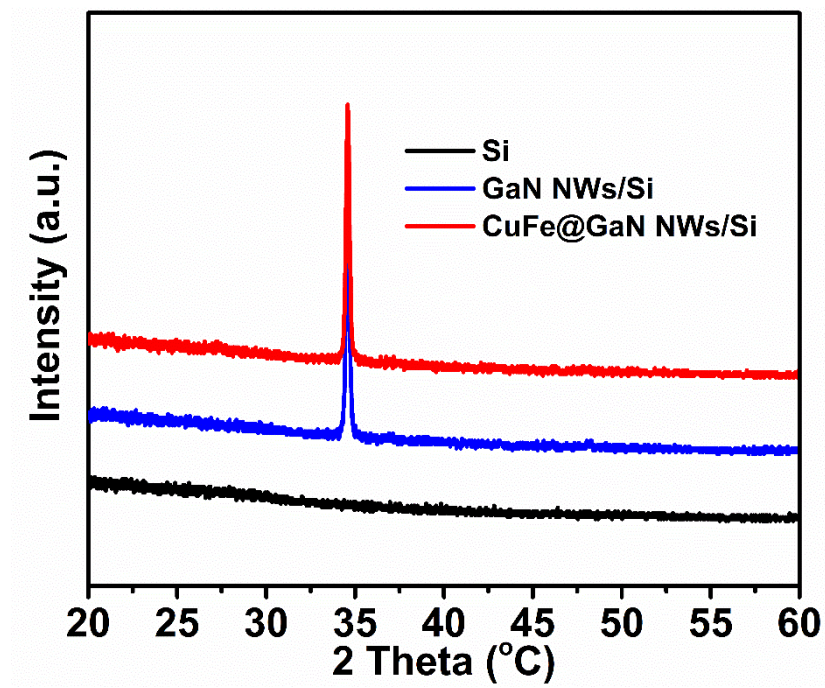

Fig. S7. X-ray diffraction spectra of n<sup>+</sup>-p silicon, GaN NWs/Si, and CuFe@GaN NWs/Si.

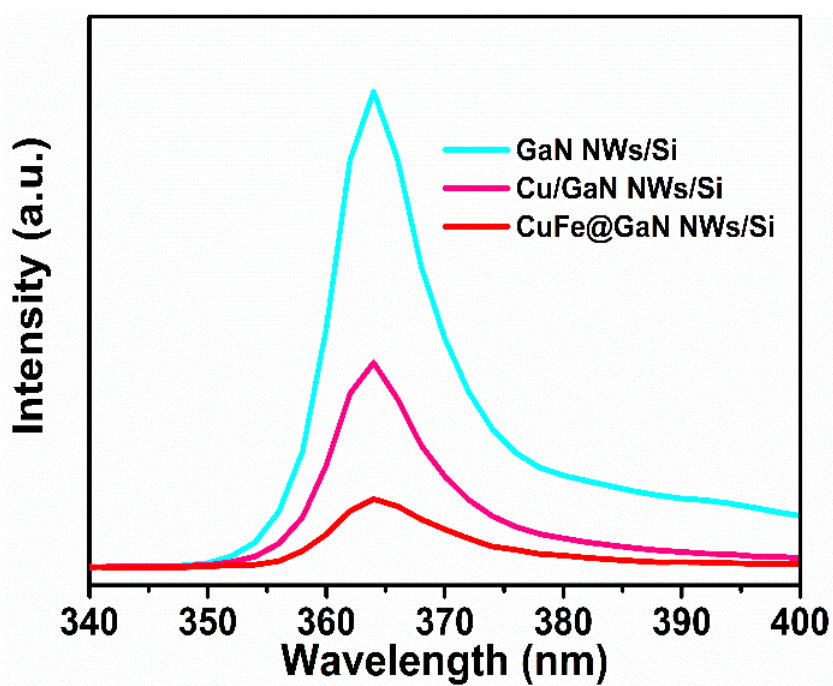

Fig. S8. Photoluminescence spectroscopy of GaN NWs/Si, Cu/GaN NWs/Si, and CuFe@GaN NWs/Si.

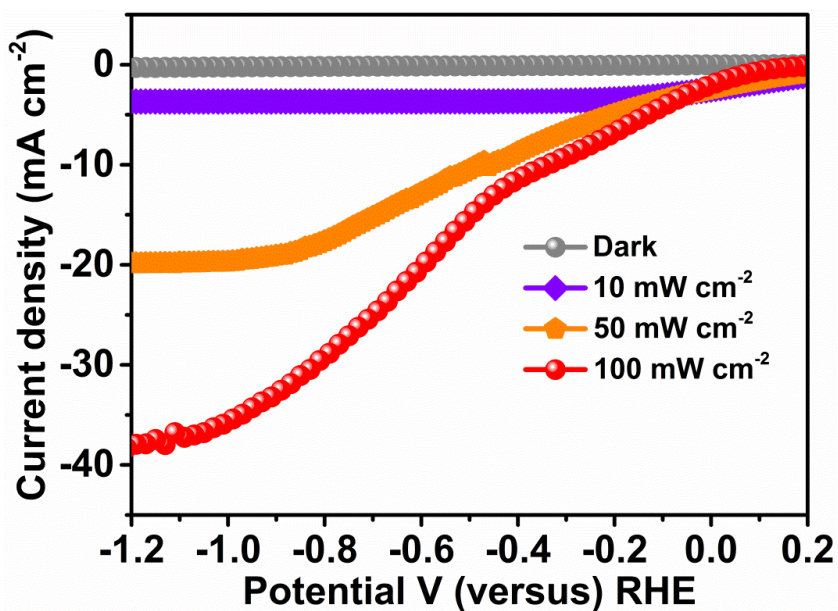

Fig. S9. Influence of the incident light intensity on the  $J$ - $V$  curves of CuFe@GaN NWs/Si in  $\text{CO}_2$ -purged 0.5 M  $\text{KHCO}_3$  aqueous solution.

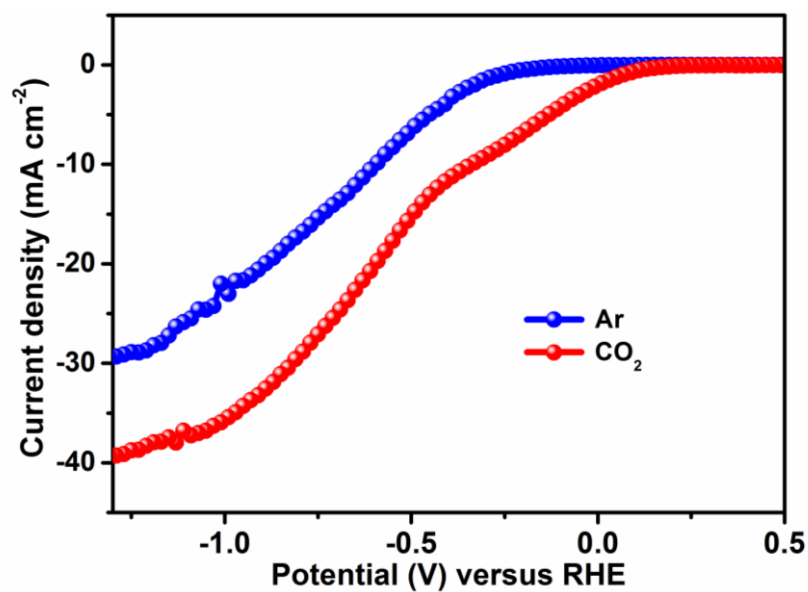

**Fig. S10.**  $J$ - $V$  curves of CuFe@GaN NWs/Si in argon-(blue) and CO<sub>2</sub>-(red) purged 0.5M KHCO<sub>3</sub> aqueous solution under one-sun illumination.

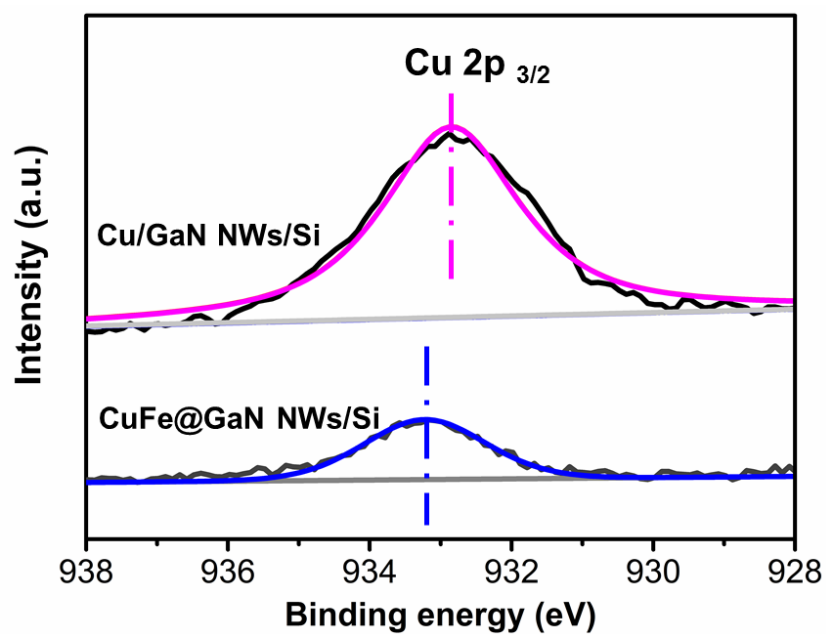

**Fig. S11.** XPS of Cu 2p of Cu/GaN NWs/Si (Cu 2p<sub>3/2</sub> = 932.9 eV) and CuFe@GaN NWs/Si (Cu 2p<sub>3/2</sub> = 933.2 eV).

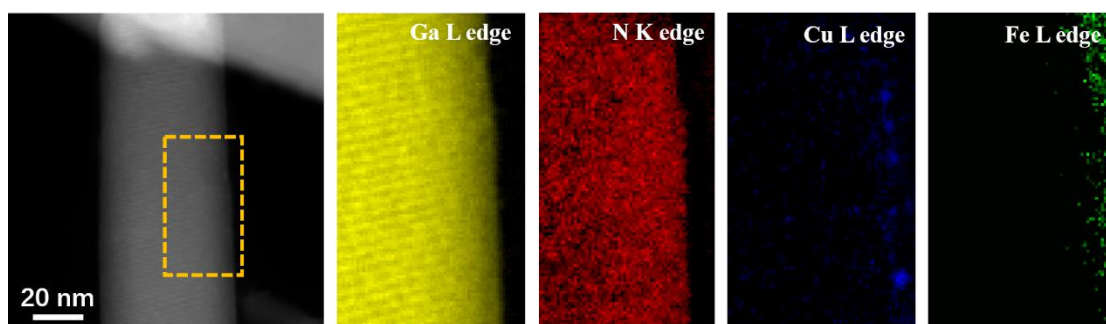

**Fig. S12.** STEM-HAADF image and the corresponding elemental distribution mappings of CuFe@GaN NWs/Si with Fe/Cu ratio of 4.5/1. The loading density of CuFe catalyst is  $\sim 0.033 \mu\text{mol cm}^{-2}$  measured by ICP-AES.

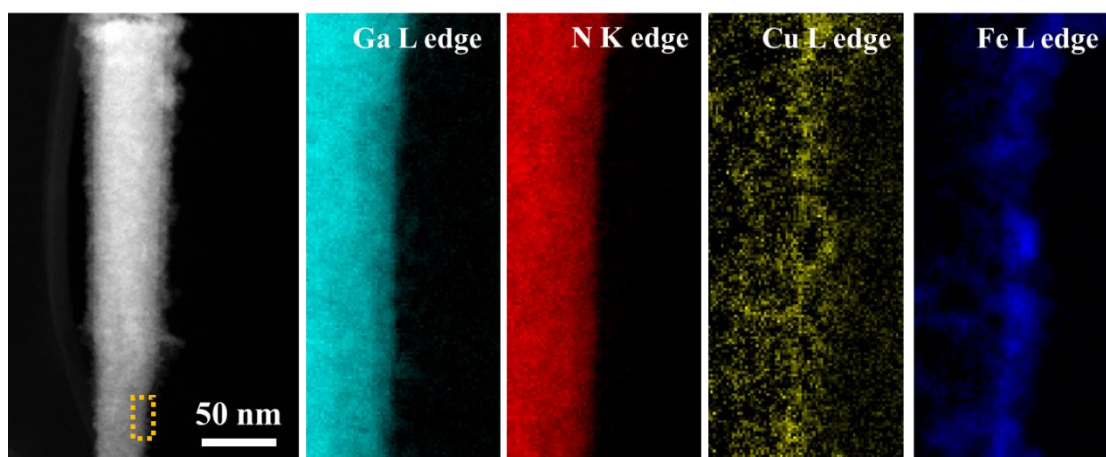

**Fig. S13.** STEM-HAADF image and the corresponding elemental distribution mappings of CuFe@GaN NWs/Si with Fe/Cu ratio of 12.9/1. The loading density of CuFe catalyst is  $\sim 0.075 \mu\text{mol cm}^{-2}$  measured by ICP-AES.



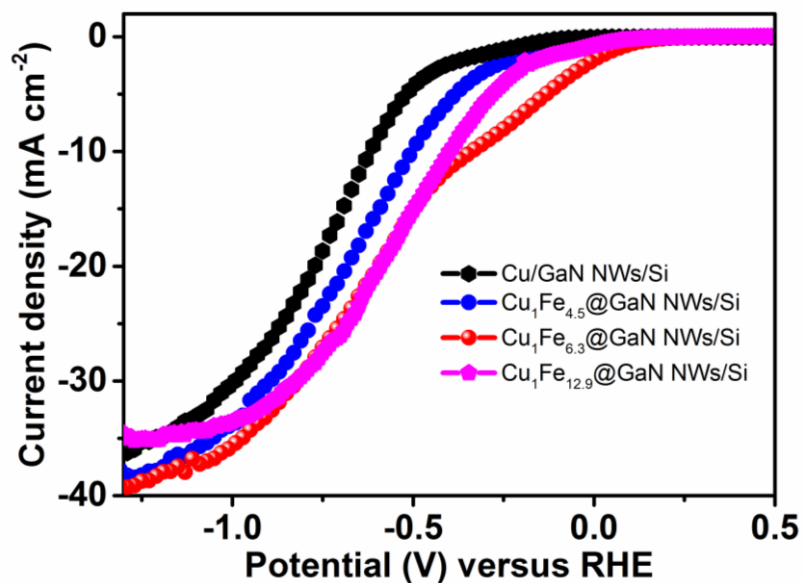

**Fig. S14.**  $J$ - $V$  curves of  $\text{Cu}_x\text{Fe}_y@$ GaN NWs/Si with different ratios of Cu to Fe in  $\text{CO}_2$ -purged 0.5 M  $\text{KHCO}_3$  aqueous solution under standard one-sun illumination.

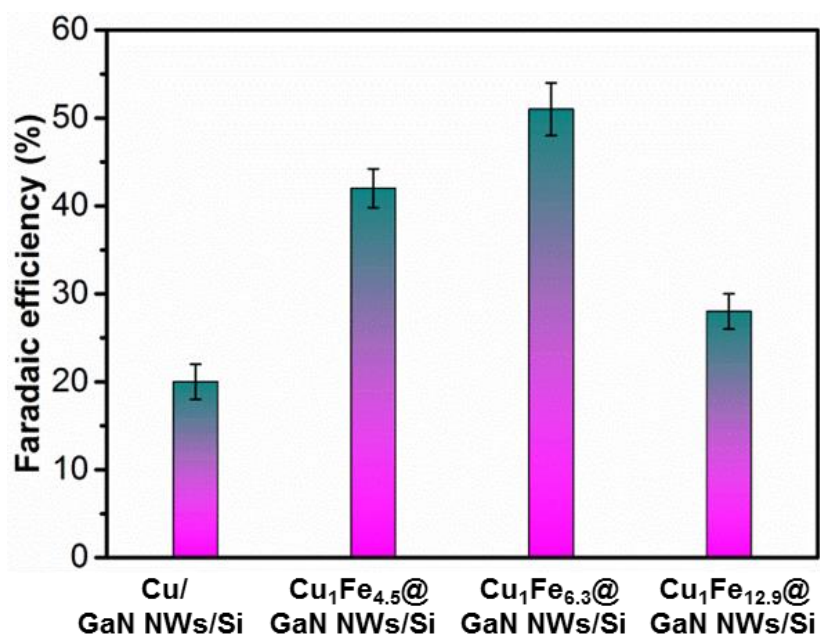

**Fig. S15.** Faradaic efficiencies of  $\text{Cu}_x\text{Fe}_y@$ GaN NWs/Si with different ratios of Cu to Fe at -1.2 V under simulated solar irradiation.

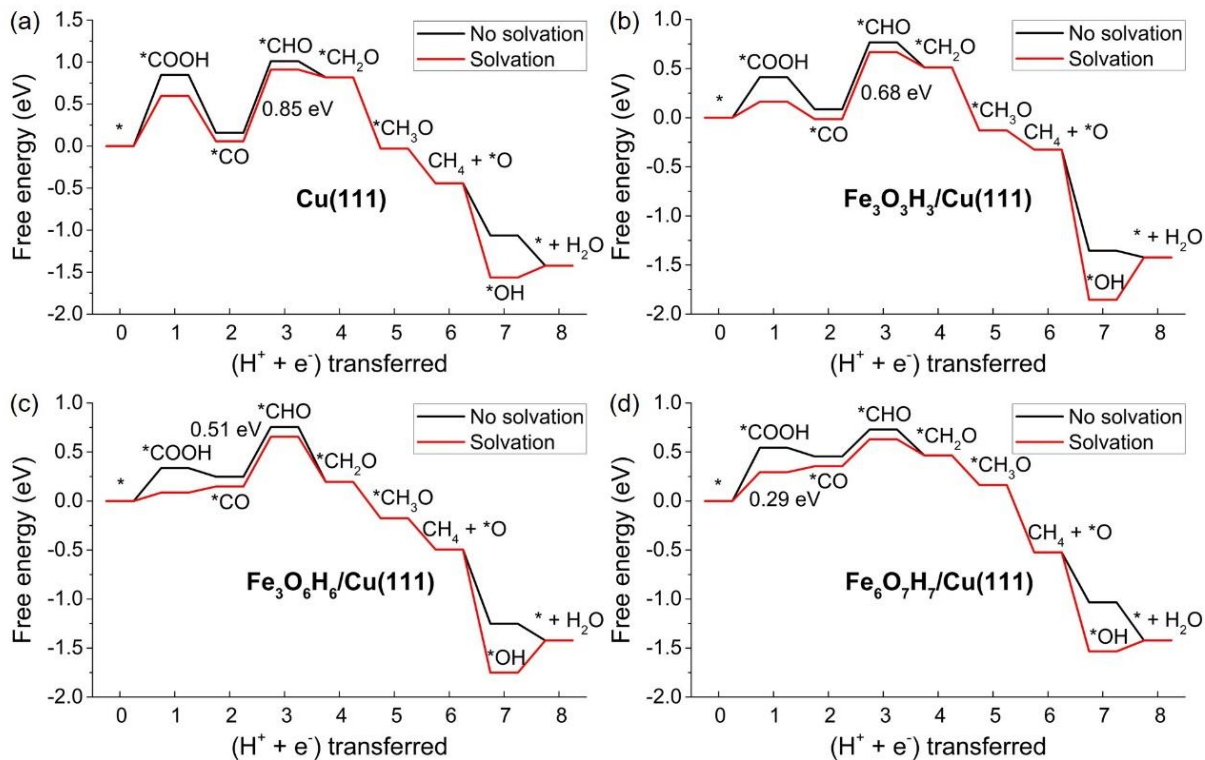

**Fig. S16.** Calculated free energy diagrams for CO<sub>2</sub>RR on (a) Cu(111), (b) Fe<sub>3</sub>O<sub>3</sub>H<sub>3</sub>/Cu(111), (c) Fe<sub>3</sub>O<sub>6</sub>H<sub>6</sub>/Cu(111), and (d) Fe<sub>6</sub>O<sub>7</sub>H<sub>7</sub>/Cu(111) with and without solvation corrections, respectively. The red and black solid lines represent the free energy pathways for CO<sub>2</sub>RR with and without solvation corrections. The values in the subfigures indicate the energy barriers for the rate-limiting step of CO<sub>2</sub>RR with solvation corrections for various possible FeO<sub>x</sub>/Cu model catalysts. On the Fe<sub>3</sub>O<sub>3</sub>H<sub>3</sub>/Cu(111), the rate-limiting step remains to be the protonation of \*CO to \*CHO with a free energy barrier of 0.68 eV. Surprisingly, the \*CHO intermediate is significantly enhanced on Fe<sub>6</sub>O<sub>7</sub>H<sub>7</sub>/Cu(111), changing the rate-limiting step to the first step of CO<sub>2</sub> activation to form \*COOH intermediate with an ultralow limiting potential of 0.29 V as compared to 0.85 V on Cu(111).

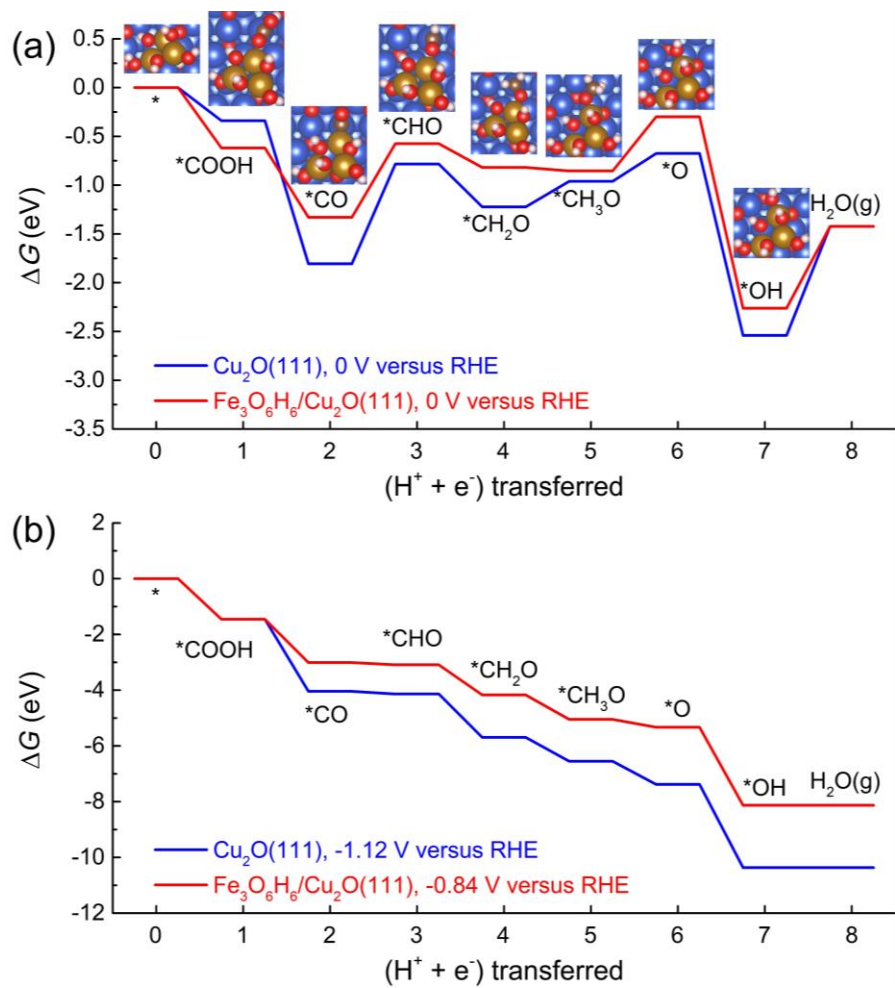

**Fig. S17.** Calculated free energy diagrams for CO<sub>2</sub>RR on Cu<sub>2</sub>O(111) and Fe<sub>3</sub>O<sub>6</sub>H<sub>6</sub>/Cu<sub>2</sub>O(111) under zero (a) and applied electrode potentials (b), respectively.

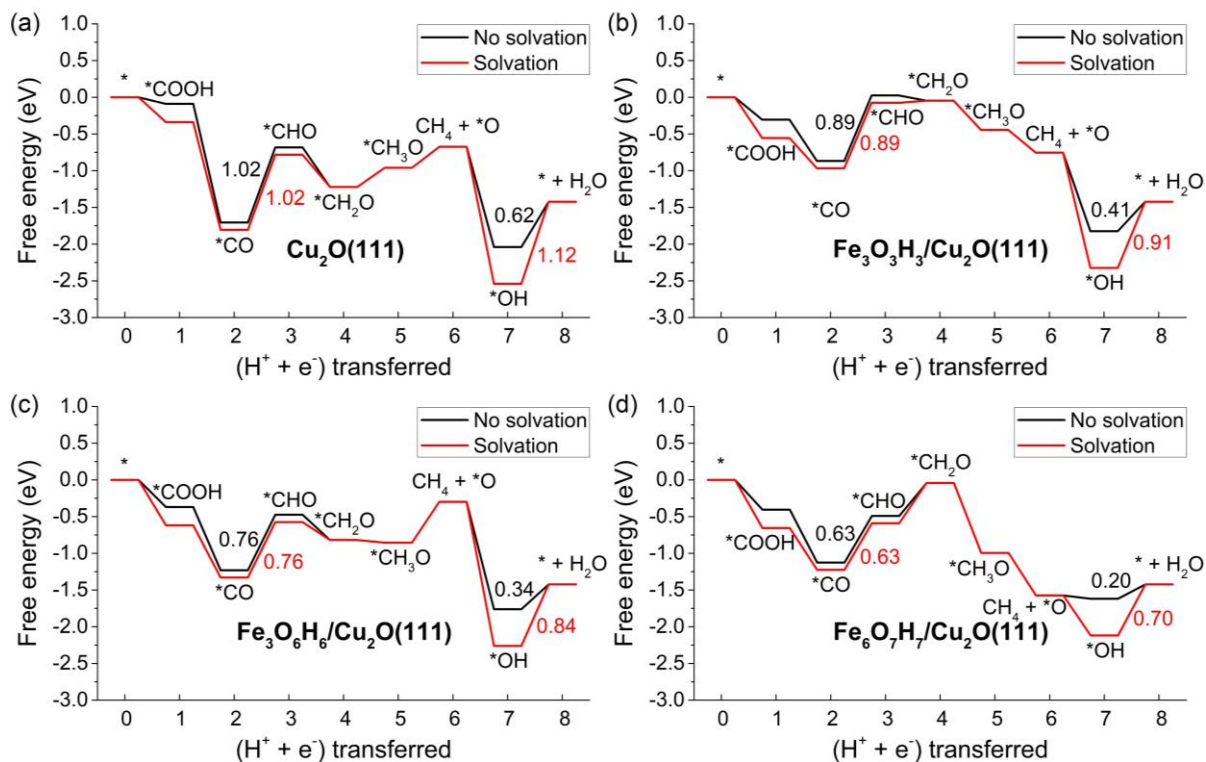

**Fig. S18.** Calculated free energy diagrams for CO<sub>2</sub>RR on (a) Cu<sub>2</sub>O(111), (b) Fe<sub>3</sub>O<sub>3</sub>H<sub>3</sub>/Cu<sub>2</sub>O(111), (c) Fe<sub>3</sub>O<sub>6</sub>H<sub>6</sub>/Cu<sub>2</sub>O(111), and (d) Fe<sub>6</sub>O<sub>7</sub>H<sub>7</sub>/Cu<sub>2</sub>O(111), respectively. The red and black solid lines represent the free energy pathways for CO<sub>2</sub>RR with and without solvation corrections. The values in the subfigures indicate the energy barriers for the potential-limiting step of CO<sub>2</sub>RR with and without solvation corrections for different Fe:O atomic ratios.

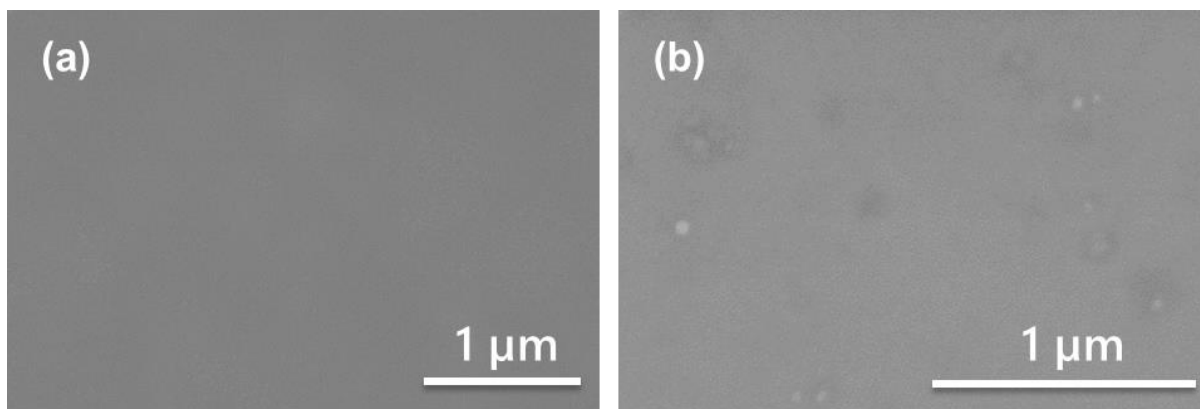

**Fig. S19.** SEM images of Si (a) and CuFe/Si (b).

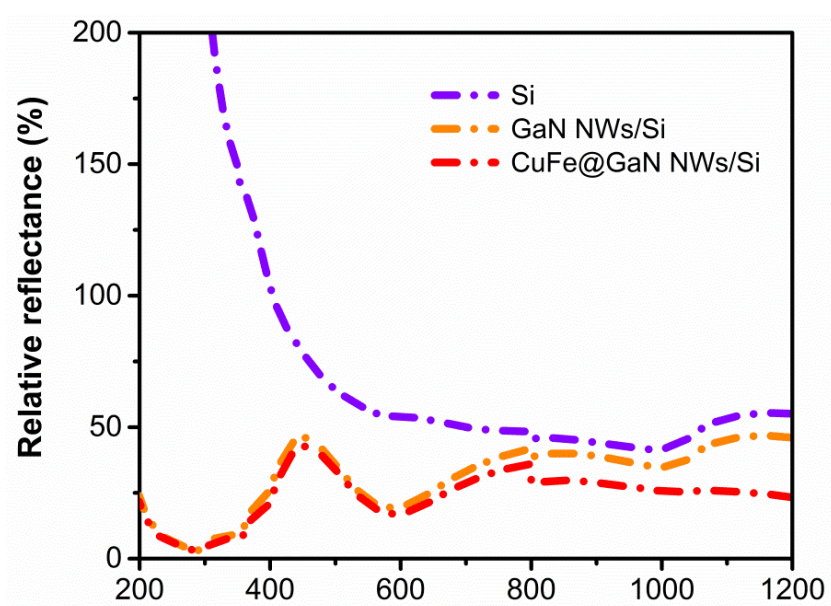

**Fig. S20.** Optical properties measurement of  $n^+$ -p Si junction, GaN NWs/Si, and CuFe@GaN NWs/Si based on UV-Vis relative differential reflectance spectroscopy.

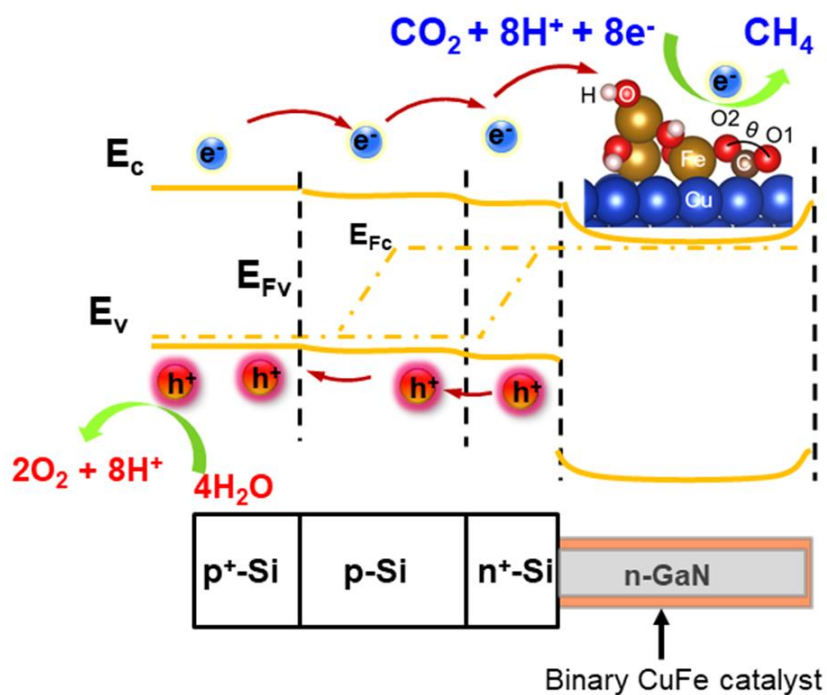

Fig. S21. Energy bandgap diagram of CuFe@GaN NWs/Si for PEC CO<sub>2</sub>RR toward CH<sub>4</sub>.

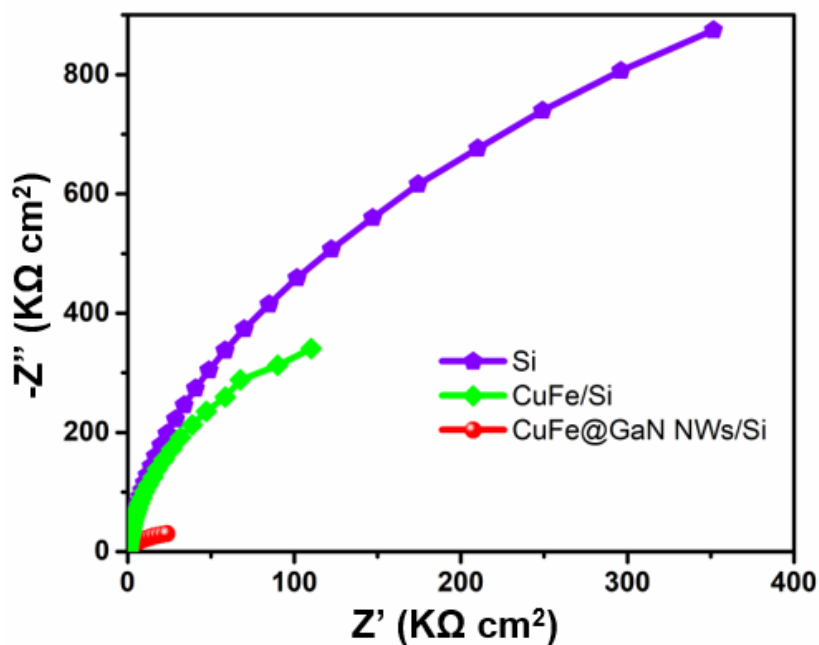

Fig. S22. Electrochemical impedance spectroscopy of n<sup>+</sup>-p Si junction, CuFe/Si, and CuFe@GaN NWs/Si in CO<sub>2</sub>-purged 0.5 M KHCO<sub>3</sub> aqueous solution under simulated solar light.

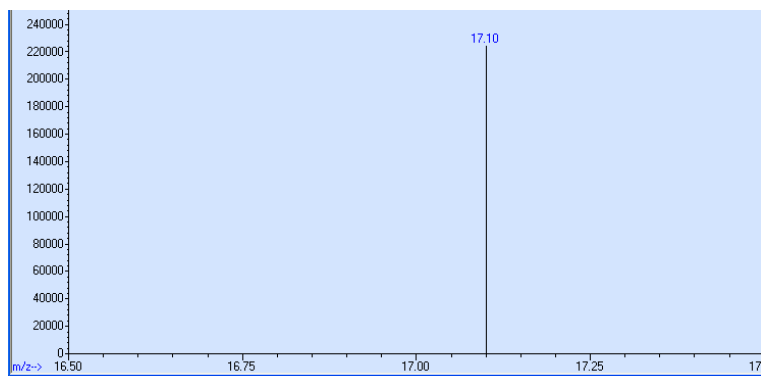

**Fig. S23.** Isotopic  $^{13}\text{CO}_2$  labeled experiments. GC-MS spectra of the product obtained from  $^{13}\text{C}$ -labeled bicarbonate aqueous solution (0.5mol/L) under  $^{13}\text{CO}_2$  atmosphere.

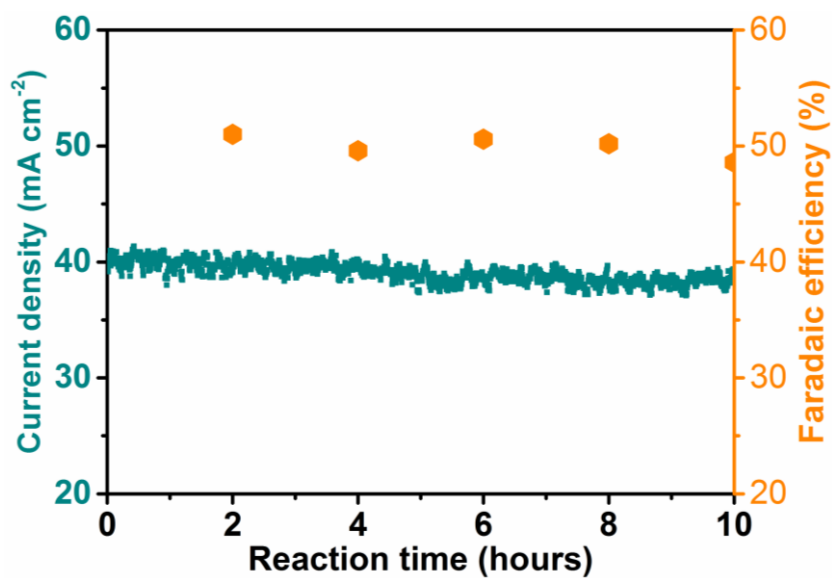

**Fig. S24.** Stability measurement of CuFe@GaN NWs/Si at -1.2 V under 1-sun illumination in  $\text{CO}_2$ -purged 0.5 M  $\text{KHCO}_3$  aqueous solution. The right y axis is the Faradaic efficiency of methane.

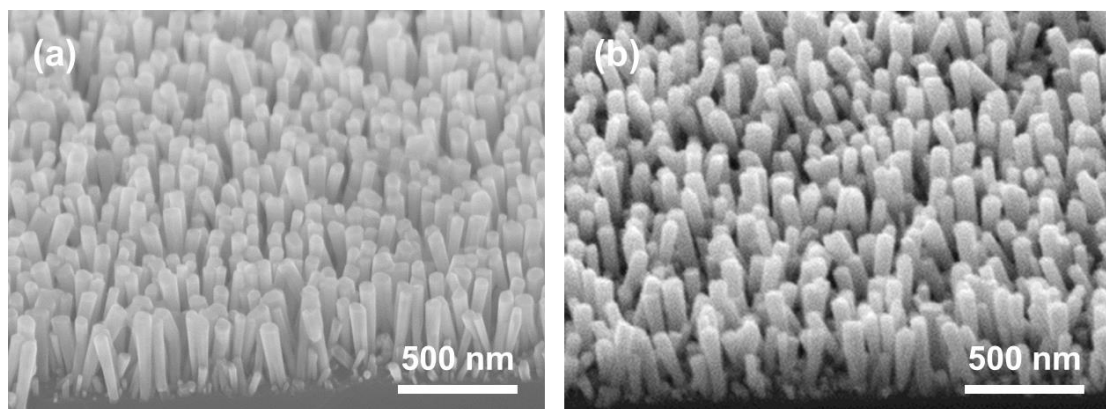

**Fig. S25.** SEM images of CuFe@GaN NWs/Si before (a) and after (b) 10 hours reactions at -1.2 V in CO<sub>2</sub>-purged 0.5 M KHCO<sub>3</sub> aqueous solution under standard one-sun irradiation.
